**Figure S1: Finn and Kristoffersen**

Phylogenetic organisation of the fishes illustrating the fraction of species spawning benthic (B) or pelagic (P) eggs, or having viviparous/ovoviviparous (V) reproduction in seawater or freshwater. A plus indicates that the mode of reproduction occurs in the given order. Estimates of minimum paleontological dates or calculated divergence times (millions of years ago; mya) according to the fossil record or mitogenomic data are given for the appearance of the major groups. Model species that are currently undergoing complete genome sequencing belong to orders highlighted in grey.

**Sources**

- Inoue JG, Miya M, Tsukamoto K, Nishida M (2004) Mitogenomic evidence for the monophyly of elopomorph fishes (Teleostei) and the evolutionary origin of the leptocephalus larva. *Mol Phylog Evol* 32: 274-284
- Inoue JG, Miya M, Venkatesh B, Nishida M (2005) The mitochondrial genome of Indoseian coelacanth *Latimeria menadoensis* (Sarcopterygii: Colacanthiformes) and divergence time estimation between the two coelacanths. *Gene* 349: 227-235
- Kumazawa Y, Nishida M (2000) Molecular phylogeny of Osteoglossoids: A new model for Gondwanian origin and plate tectonic transportation of the asian aruwana. *Mol Biol Evol* 17: 1869-1878
- Long JA (1995) The rise of fishes. 500 million years of evolution. The John Hopkins University Press, Baltimore
- Maissey JG (1996) Discovering fossil fishes. Westview Press, New York
- Moser HG (1983) Ontogeny and systematics of fishes. American Society Ichthyologists Herpetologists Special publication Number 1. Symposium 15-18 Aug, La Jolla, California
- Nelson JS (2006) Fishes of the world. John Wiley & Sons Inc, New York
- Russell FS (1976) The eggs and planktonic stages of British marine fishes. Academic Press, New York
- Stiassny MLJ, Parenti LR, Johnson GD (1996) Interrelationships of fishes. Academic Press, New York

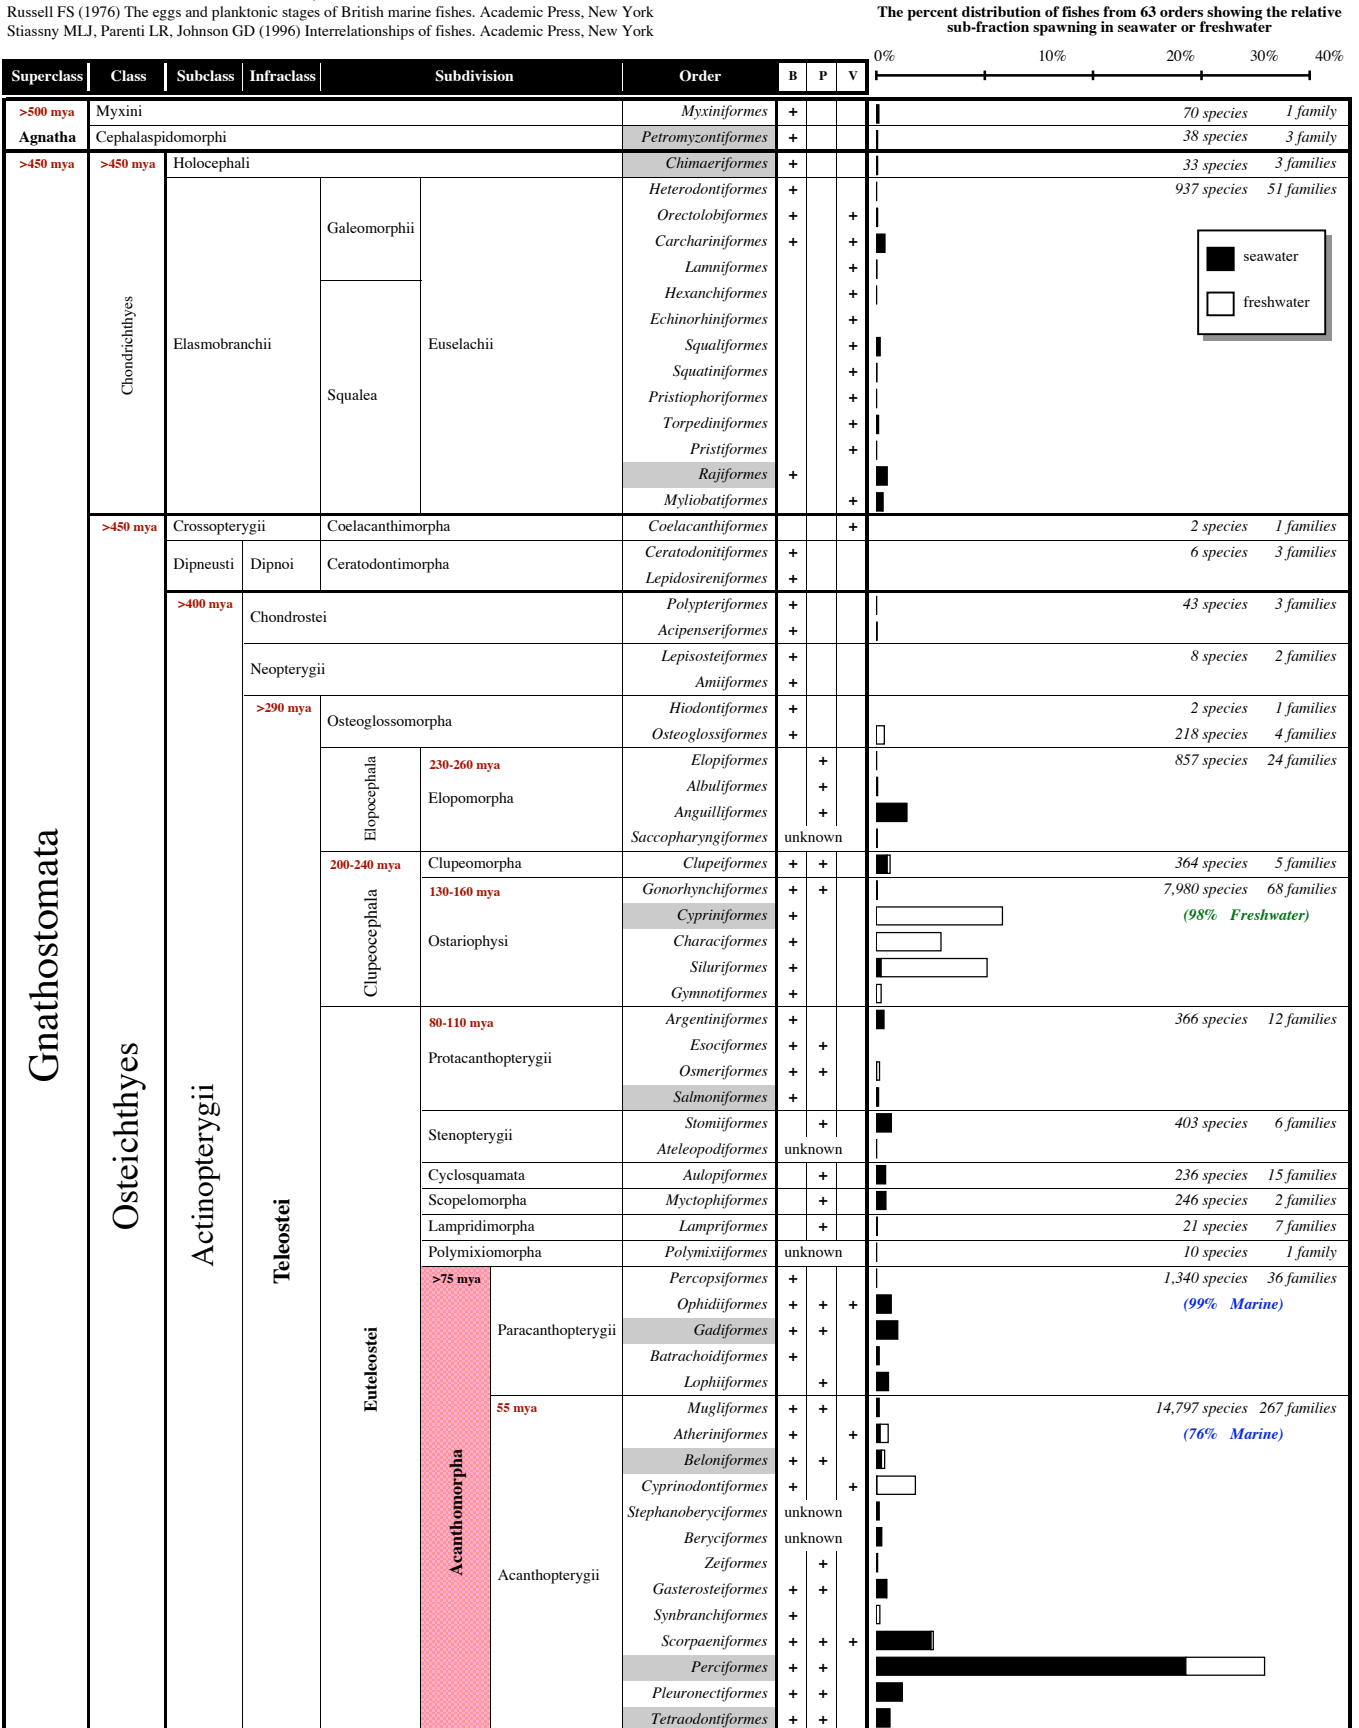

Source: https://storage.googleapis.com/plos-corpus-prod/10.1371/journal.pone.0000169/1/pone.0000169.s001.pdf
