**Table S1: Supplementary material: Finn and Kristoffersen**

Accession numbers of sequences and taxa used in the analyses

| Accession #<br>(NCBI / Ensembl) | Database ID  | Classified |                     | Order              | Animal               | Species                          | Length |       | Source                                             |
|---------------------------------|--------------|------------|---------------------|--------------------|----------------------|----------------------------------|--------|-------|----------------------------------------------------|
|                                 |              | homologue  | Rank/Class          |                    |                      |                                  | bp     | aa    |                                                    |
| 1 HUMAPOBB                      | apo-B100     | apoB100    | Eutheria            | Primates           | Human                | <i>Homo sapiens</i>              | 13,689 | 4,563 | Law et al. (1986)                                  |
| 2 ENSGALP00000026550            | apo-B100     | apoB100    | Aves                | Galliformes        | Chicken              | <i>Gallus gallus</i>             | 12,267 | 4,089 | Ensembl (2006)                                     |
| 3 D89547                        | Vit1         | vtgAB1     |                     |                    | Chicken              | <i>Gallus gallus</i>             | 5,736  | 1,912 | Mabuchi et al. (1999)                              |
| 4 NM_001031276                  | vtgII        | vtgAB2     |                     |                    | Chicken              | <i>Gallus gallus</i>             | 5,550  | 1,850 | van het Schip et al. (1999)                        |
| 5 ENSGALT0000002890             | novel        | vtgAB3     |                     |                    | Chicken              | <i>Gallus gallus</i>             | 5,058  | 1,686 | Ensembl (2006)                                     |
| 6 AY045719                      | vitellogenin | vtgAB      |                     | Charadriiformes    | Herring gull         | <i>Larus argentatus</i>          | 5,496  | 1,832 | Lorenzen et al. (2001)                             |
| 7 AAH54229                      | apo-B100     | apoB100    | Amphibia            | Anura              | African clawed frog  | <i>Xenopus laevis</i>            | 1,311  | 437   | Klein et al. (2002)                                |
| 8 M18061                        | vtgA2        | vtgABa     |                     |                    | African clawed frog  | <i>Xenopus laevis</i>            | 5,421  | 1,807 | Gerber-Huber et al. (1987); Nardelli et al. (1987) |
| 9 AB092605                      | vtgB1        | vtgABb     |                     |                    | African clawed frog  | <i>Xenopus laevis</i>            | 5,451  | 1,817 | Yoshitome et al. (2003)                            |
| 10 NEWSINFRUP00000127842        | apo-B100     | apoB100    | Acanthopterygii     | Tetraodontiformes  | Torafugu             | <i>Takifugu rubripes</i>         | 11,145 | 3,715 | Ensembl (2006)                                     |
| 11 NEWSINFRUP00000179080        | novel        | vtgAb      |                     |                    | Torafugu             | <i>Takifugu rubripes</i>         | 5,274  | 1,758 | Ensembl (2006)                                     |
| 12 NEWSINFRUP00000131263        | novel        | vtgC       |                     |                    | Torafugu             | <i>Takifugu rubripes</i>         | 3,594  | 1,198 | Ensembl (2006)                                     |
| 13 hhvtgAa1                     | vtgAa1       | vtgAa      |                     | Pleuronectiformes  | Atlantic halibut     | <i>Hippoglossus hippoglossus</i> | 4,899  | 1,633 | Finn et al. (2006)                                 |
| 14 hhvtgAb1                     | vtgAb1       | vtgAb      |                     |                    | Atlantic halibut     | <i>Hippoglossus hippoglossus</i> | 4,941  | 1,647 | Finn et al. (2006)                                 |
| 15 AB181833                     | VgA          | vtgAa      |                     |                    | Barfin flounder      | <i>Verasper moseri</i>           | 4,884  | 1,628 | Sawaguchi et al. (2005)                            |
| 16 AB181834                     | VgB          | vtgAb      |                     |                    | Barfin flounder      | <i>Verasper moseri</i>           | 4,953  | 1,651 | Sawaguchi et al. (2005)                            |
| 17 AF017250                     | VtG1         | vtgAb      |                     | Perciformes        | Blue Tilapia         | <i>Oreochromis aureus</i>        | 5,364  | 1,788 | Lim et al. (1997)                                  |
| 18 AB088473                     | Vg-530       | vtgAa      |                     |                    | Japanese common goby | <i>Acanthogobius flavimanus</i>  | 4,992  | 1,664 | Ohkubo et al. (2004)                               |
| 19 AB088474                     | Vg-320       | vtgC       |                     |                    | Japanese common goby | <i>Acanthogobius flavimanus</i>  | 3,714  | 1,238 | Ohkubo et al. (2004)                               |
| 20 AB081299                     | VgA          | vtgAa      |                     |                    | Japanese silago      | <i>Sillago japonica</i>          | 5,103  | 1,701 | Yoon et al. (2002)                                 |
| 21 AB181838                     | VgA          | vtgAa      |                     |                    | Red seabream         | <i>Pagrus major</i>              | 5,145  | 1,715 | Sawaguchi et al. (2006)                            |
| 22 AB181839                     | VgB          | vtgAb      |                     |                    | Red seabream         | <i>Pagrus major</i>              | 5,148  | 1,716 | Sawaguchi et al. (2006)                            |
| 23 AB181840                     | VgC          | vtgC       |                     |                    | Red seabream         | <i>Pagrus major</i>              | 3,816  | 1,272 | Sawaguchi et al. (2006)                            |
| 24 ENSGACP00000012923           | novel        | vtgAa      |                     | Gasterosteiformes  | 3-spined stickleback | <i>Gasterosteus aculeatus</i>    | 4,962  | 1,654 | Ensembl (2006)                                     |
| 25 ENSGACP00000012842           | novel        | vtgAb      |                     |                    | 3-spined stickleback | <i>Gasterosteus aculeatus</i>    | 2,952  | 984   | Ensembl (2006)                                     |
| 26 ENSGACP00000012536           | novel        | vtgC       |                     |                    | 3-spined stickleback | <i>Gasterosteus aculeatus</i>    | 3,813  | 1,271 | Ensembl (2006)                                     |
| 27 AB181835                     | VgA          | vtgAa      |                     | Atheriniformes     | Mosquitofish         | <i>Gambusia affinis</i>          | 5,085  | 1,695 | Sawaguchi et al. (2005)                            |
| 28 AB181836                     | VgB          | vtgAb      |                     |                    | Mosquitofish         | <i>Gambusia affinis</i>          | 5,025  | 1,675 | Sawaguchi et al. (2005)                            |
| 29 AB181837                     | VgC          | vtgC       |                     |                    | Mosquitofish         | <i>Gambusia affinis</i>          | 3,726  | 1,242 | Sawaguchi et al. (2005)                            |
| 30 AB064320                     | Ol-vit1      | vtgAa      |                     | Beloniformes       | Medaka               | <i>Oryzias latipes</i>           | 5,034  | 1,678 | Arai et al. (2001); Fujiwara et al. (2002)         |
| 31 AB074891                     | vtgII        | vtgAb      |                     |                    | Medaka               | <i>Oryzias latipes</i>           | 5,175  | 1,725 | Murakami and Nakai (2003)                          |
| 32 ENSORLP00000008173           | novel        | vtgC       |                     |                    | Medaka               | <i>Oryzias latipes</i>           | 3,663  | 1,221 | Ensembl (2006)                                     |
| 33 AY279214                     | vtg          | vtgAa      |                     | Cyprinodontiformes | Mangrove killifish   | <i>Kryptolebias marmoratus</i>   | 5,133  | 1,711 | Kim et al. (2004)                                  |
| 34 U07055                       | vtgI         | vtgAa      |                     |                    | Common mummichog     | <i>Fundulus heteroclitus</i>     | 5,112  | 1,704 | LaFleur et al. (1995)                              |
| 35 FHU70826                     | vtgII        | vtgAb      |                     |                    | Common mummichog     | <i>Fundulus heteroclitus</i>     | 5,061  | 1,687 | LaFleur et al. (1995)                              |
| 36 AF284035                     | VtGA         | vtgAa      | Paracanthopterygii  | Gadiformes         | Haddock              | <i>Melanogrammus aeglefinus</i>  | 4,995  | 1,665 | Reith et al. (2001)                                |
| 37 AF284034                     | VtGB         | vtgAb      |                     |                    | Haddock              | <i>Melanogrammus aeglefinus</i>  | 4,929  | 1,643 | Reith et al. (2001)                                |
| 38 AF454748                     | VtGA         | vgAsa      | Protacanthopterygii | Salmoniformes      | Chinook salmon       | <i>Oncorhynchus tshawytscha</i>  | 804    | 268   | Buisine et al. (2002)                              |
| 39 AF454747                     | VtGA         | vgAsa      |                     |                    | Coho Salmon          | <i>Oncorhynchus kisutch</i>      | 807    | 269   | Buisine et al. (2002)                              |
| 40 X92804                       | vtgI         | vgAsa      |                     |                    | Rainbow trout        | <i>Oncorhynchus mykiss</i>       | 4,977  | 1,659 | Mouchel et al. (1996)                              |
| 41 AF454751                     | VtGA         | vgAsa      |                     |                    | Artic charr          | <i>Salvelinus alpinus</i>        | 810    | 270   | Buisine et al. (2002)                              |
| 42 AF454752                     | VtGA         | vgAsa      |                     |                    | Brook trout          | <i>Salvelinus fontinalis</i>     | 807    | 269   | Buisine et al. (2002)                              |
| 43 AF454749                     | VtGB         | vgAsb      |                     |                    | Atlantic salmon      | <i>Salmo salar</i>               | 849    | 283   | Buisine et al. (2002)                              |
| 44 AF454750                     | VtGA         | vgAsa      |                     |                    | Brown trout          | <i>Salmo trutta</i>              | 807    | 269   | Buisine et al. (2002)                              |
| 45 AF454745                     | VtGA         | vgAsa      |                     |                    | Whitefish            | <i>Coregonus lavaretus</i>       | 807    | 269   | Buisine et al. (2002)                              |
| 46 AF454746                     | VtGB         | vgAsb      |                     |                    | Whitefish            | <i>Coregonus lavaretus</i>       | 807    | 269   | Buisine et al. (2002)                              |
| 47 AF454753                     | VtGA         | vgAsa      |                     |                    | Grayling             | <i>Thymallus thymallus</i>       | 807    | 269   | Buisine et al. (2002)                              |
| 48 AF454754                     | VtGB         | vgAsb      |                     |                    | Grayling             | <i>Thymallus thymallus</i>       | 807    | 269   | Buisine et al. (2002)                              |
| 49 AF414432                     | vitellogenin | vtgAo1     | Ostariophysi        | Cypriniformes      | Common carp          | <i>Cyprinus carpio</i>           | 4,059  | 1,353 | Chang et al. (2001); Lai et al. (2001)             |
| 50 AB106873                     | vitellogenin | vtgAo2     |                     |                    | Common carp          | <i>Cyprinus carpio</i>           | 4,872  | 1,624 | Han et al. (2004)                                  |
| 51 AF130354                     | vtg          | vtgAo1     |                     |                    | Fathead Minnow       | <i>Pimephales promelas</i>       | 4,017  | 1,339 | Korte et al. (2000)                                |
| 52 ENSDARP000000062792          | apo-B100     | apoB100    |                     |                    | Zebrafish            | <i>Danio rerio</i>               | 11,346 | 3,782 | Ensembl (2006)                                     |
| 53 AF406784                     | vtgI         | vtgAo1     |                     |                    | Zebrafish            | <i>Danio rerio</i>               | 4,086  | 1,362 | Islinger et al. (2003)                             |
| 54 ENSDARP00000018269           | novel        | vtgAo1     |                     |                    | Zebrafish            | <i>Danio rerio</i>               | 3,147  | 1,049 | Ensembl (2006)                                     |
| 55 ENSDARP000000061222          | novel        | vtgAo1     |                     |                    | Zebrafish            | <i>Danio rerio</i>               | 4,977  | 1,659 | Ensembl (2006)                                     |
| 56 ENSDARP00000044868           | novel        | vtgAo2     |                     |                    | Zebrafish            | <i>Danio rerio</i>               | 5,010  | 1,670 | Ensembl (2006)                                     |
| 57 ENSDARP00000046417           | novel        | vtgAo2     |                     |                    | Zebrafish            | <i>Danio rerio</i>               | 5,022  | 1,674 | Ensembl (2006)                                     |
| 58 ENSDARP000000061149          | novel        | vtgAo2     |                     |                    | Zebrafish            | <i>Danio rerio</i>               | 4,890  | 1,630 | Ensembl (2006)                                     |
| 59 ENSDARP000000061160          | novel        | vtgAo2     |                     |                    | Zebrafish            | <i>Danio rerio</i>               | 5,061  | 1,687 | Ensembl (2006)                                     |
| 60 ENSDARP000000061164          | novel        | vtgAo2     |                     |                    | Zebrafish            | <i>Danio rerio</i>               | 5,064  | 1,688 | Ensembl (2006)                                     |
| 61 AF254638                     | vg3          | vtgC       |                     |                    | Zebrafish            | <i>Danio rerio</i>               | 3,753  | 1,251 | Wang et al. (2000)                                 |
| 62 AY775788                     | VtG          | vtgAe1     | Elopomorpha         | Anguilliformes     | Japanese eel         | <i>Anguilla japonica</i>         | 5,226  | 1,742 | Wang and Lou (2006)                                |
| 63 AY423445                     | VTG1         | vtgAe2     |                     |                    | Japanese eel         | <i>Anguilla japonica</i>         | 5,202  | 1,734 | Okumura et al. (2003); Mikawa et al. (2006)        |
| 64 AY423444                     | VTG2         | vtgAe3     |                     |                    | Japanese eel         | <i>Anguilla japonica</i>         | 5,277  | 1,759 | Okumura et al. (2003); Mikawa et al. (2006)        |
| 65 AB185334                     | vtg          | vtgAe1     |                     |                    | Conger eel           | <i>Conger myriaster</i>          | 4,989  | 1,663 | Mikawa et al. (2006)                               |
| 66 U00455                       | vitellogenin | vtgAB      | Chondrostei         | Acipenseriformes   | White Sturgeon       | <i>Acipenser transmontanus</i>   | 5,031  | 1,677 | Bidwell and Carlson (1995)                         |
| 67 M88749                       | vitellogenin | vtgABCD    | Hyperoartia         | Petromyzontiformes | Silver lamprey       | <i>Ichthyomyzon unicuspis</i>    | 5,469  | 1,823 | Sharrock et al. (1992)                             |
| 68 AB084783                     | vg           | vtg        | Mollusca            | Ostreoida          | Pacific oyster       | <i>Crassostrea gigas</i>         | 4,749  | 1,583 | Matsumoto et al. (2002)                            |
| 69 AB179781                     | Vg           | vtg        | Anthozoa            | Scleractinia       | Galaxy Coral         | <i>Galaxea fascicularis</i>      | 4,317  | 1,439 | Hayakawa et al. (2004; 2006)                       |
